# Supplementary material for: Tadpole-shaped β-cyclodextrin-tagged poly(N-vinylpyrrolidone): synthesis, characterization and studies of its complexation with phenolphthalein and anti tumor activities
Source: Royal Society of Chemistry journal article supplement (doi:10.1039/c4ra15359f), 2015-01-01
Supplement: c4ra15359f1.pdf [file c4ra15359f1.pdf]

## Supporting Information

# Tadpole-shaped $\beta$ -Cyclodextrin-tagged Poly(*N*-Vinylpyrrolidone): Synthesis, Characterization and Studies of Its Complexation with Phenolphthalein and Anti Tumor Activities

Niraj Kumar Vishwakarma,<sup>1,†</sup> Vijay Kumar Patel,<sup>1,†</sup> Sumit Kumar Hira,<sup>2†</sup> K. Ramesh,<sup>1,3</sup> Prateek Srivastava,<sup>1,2</sup> Kheyannath Mitra,<sup>1</sup> Shikha Singh,<sup>1</sup> Dipankar Chattopadhyay,<sup>4</sup> Pralay Maiti,<sup>5</sup> Nira Misra,<sup>3</sup> Partha Pratim Manna,<sup>2\*</sup> Biswajit Ray<sup>1\*</sup>

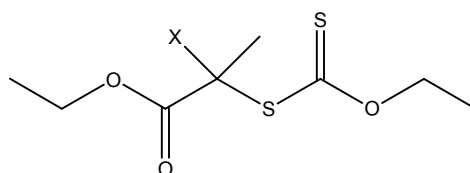

(a) X = H (**X1**), CH<sub>3</sub> (**X2**)

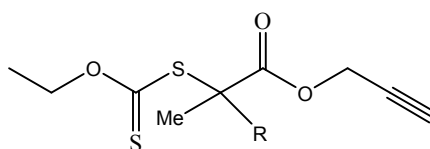

(b) R = H, (*S*)-2-(Propynyl propionate)-(O-ethyl xanthate) (**X3**)  
R = CH<sub>3</sub>, (*S*)-2-(Propynyl isobutyrate)-(O-ethyl xanthate) (**X4**)

**Scheme S1.** Structures of RAFT Agents

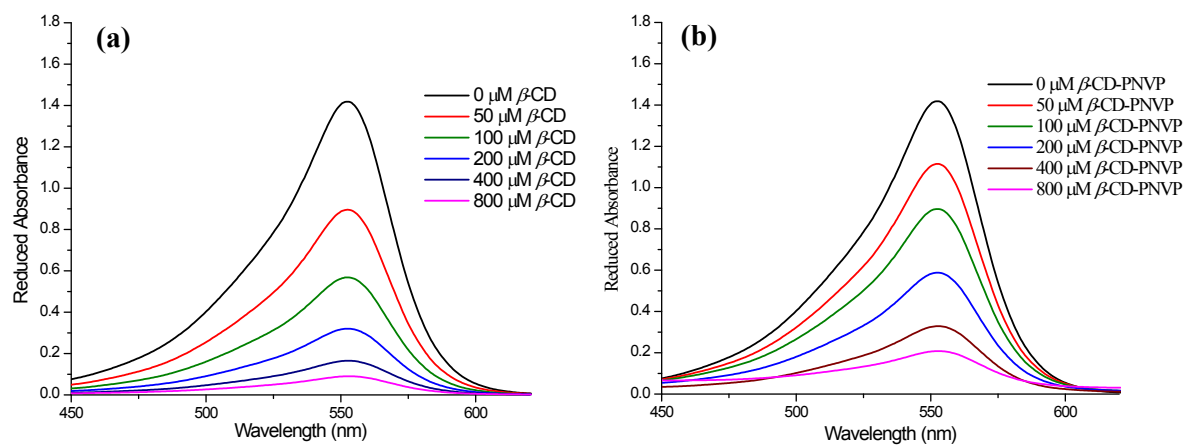

**Figure S1.** UV-Visible absorption spectra of buffered phenolphthalein solutions (pH 10) with different concentrations of (a)  $\beta$ -CD, and (b)  $\beta$ -CD-tagged PNVP.
